# Supplementary material
Source: MDPI journal article supplement (https://www.mdpi.com/2073-4344/11/6/697)
Supplement: s1 [file s1 › catalysts-1230852-supplementary.pdf]

## Supplementary Materials

# Influence of Ni on Fe and Co-Fe based Catalysts for High-Calorific Synthetic Natural Gas

Tae Young Kim<sup>1</sup>, Seongbin Jo<sup>2</sup>, Yeji Lee<sup>3</sup>, Suk-Hwan Kang<sup>4</sup>, Joon Woo Kim<sup>5</sup>, Soo Chool Lee<sup>3,\*</sup> and Jae Chang Kim<sup>1,\*</sup>

<sup>1</sup> Department of Chemical Engineering, Kyungpook National University, Daegu 41566, Korea; tyoung0218@knu.ac.kr

<sup>2</sup> Department of Chemical and Environmental Engineering, University of California–Riverside, Riverside, CA 92521, USA; sjo016@ucr.edu

<sup>3</sup> Research Institute of Advanced Energy Technology, Kyungpook National University, Daegu 41566, Korea; yejeelee@knu.ac.kr

<sup>4</sup> Institute for Advanced Engineering, Yongin 41718, Korea; shkang@iae.re.kr

<sup>5</sup> Research Institute of Industrial Science and Technology, Pohang 37673, Korea; realjoon@rist.re.kr

\* Correspondence: soochool@knu.ac.kr (S.C.L.); kjchang@knu.ac.kr (J.C.K.); Tel.: +82-53-950-5622 (S.C.L. & J.C.K.)

**Citation:** Kim, T.-Y.; Jo, S.; Lee, Y.; Kang, S.-H.; Kim, J.-W.; Lee, S.-C.; Kim, J.-C. Influence of Ni on Fe and Co-Fe Based Catalysts for High-Calorific Synthetic Natural Gas. *Catalysts* **2021**, *11*, 697. <https://doi.org/10.3390/catal11060697>

Academic Editor: Sergei Chernyak

Received: 6 May 2021

Accepted: 28 May 2021

Published: 31 May 2021

**Publisher's Note:** MDPI stays neutral with regard to jurisdictional claims in published maps and institutional affiliations.

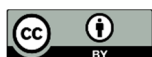

**Copyright:** © 2021 by the authors. Licensee MDPI, Basel, Switzerland. This article is an open access article distributed under the terms and conditions of the Creative Commons Attribution (CC BY) license (<http://creativecommons.org/licenses/by/4.0/>).

**Table S1.** CO conversion and selectivity with Fe-Ni and Co-Fe-Ni catalysts at a reaction time of 10 h.

| Catalyst     | CO<br>conv.<br>(%) | Selectivity (%) |                                |                  |                 |
|--------------|--------------------|-----------------|--------------------------------|------------------|-----------------|
|              |                    | CH <sub>4</sub> | C <sub>2</sub> -C <sub>4</sub> | C <sub>5</sub> + | CO <sub>2</sub> |
| 20Fe         | 54 ± 0.4           | 21.8 ± 0.2      | 26.6 ± 0.4                     | 26.2 ± 0.2       | 25.4 ± 0.3      |
| 15Fe-5Ni     | 100 ± 0.1          | 65.1 ± 0.5      | 15.4 ± 0.2                     | 4.8 ± 0.3        | 14.7 ± 0.2      |
| 10Fe-10Ni    | 100 ± 0.1          | 96.6 ± 0.4      | 0.2 ± 0.1                      | 0.0              | 3.2 ± 0.4       |
| 20Ni         | 91.5 ± 0.3         | 77.1 ± 0.3      | 8.6 ± 0.1                      | 9.4 ± 0.1        | 4.9 ± 0.2       |
| 5Co-15Fe     | 91.5 ± 1.0         | 23.5 ± 0.7      | 28.2 ± 0.6                     | 26.0 ± 1.6       | 22.3 ± 0.4      |
| 5Co-15Fe-2Ni | 98.3 ± 0.2         | 38.9 ± 0.2      | 22.3 ± 0.6                     | 15.1 ± 0.7       | 23.6 ± 0.2      |
| 5Co-15Fe-5Ni | 99.9 ± 0.1         | 51.9 ± 0.1      | 21.9 ± 0.2                     | 14.1 ± 0.3       | 12.1 ± 0.2      |

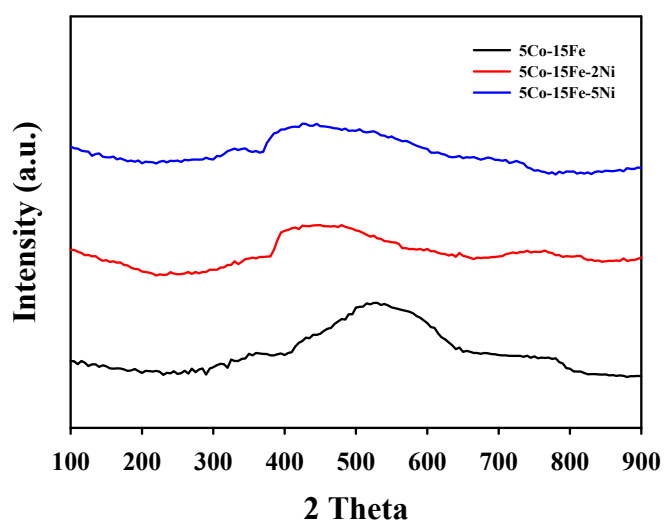**Figure S1.** H<sub>2</sub>-TPR profiles of the Co-Fe and Co-Fe-Ni catalysts.

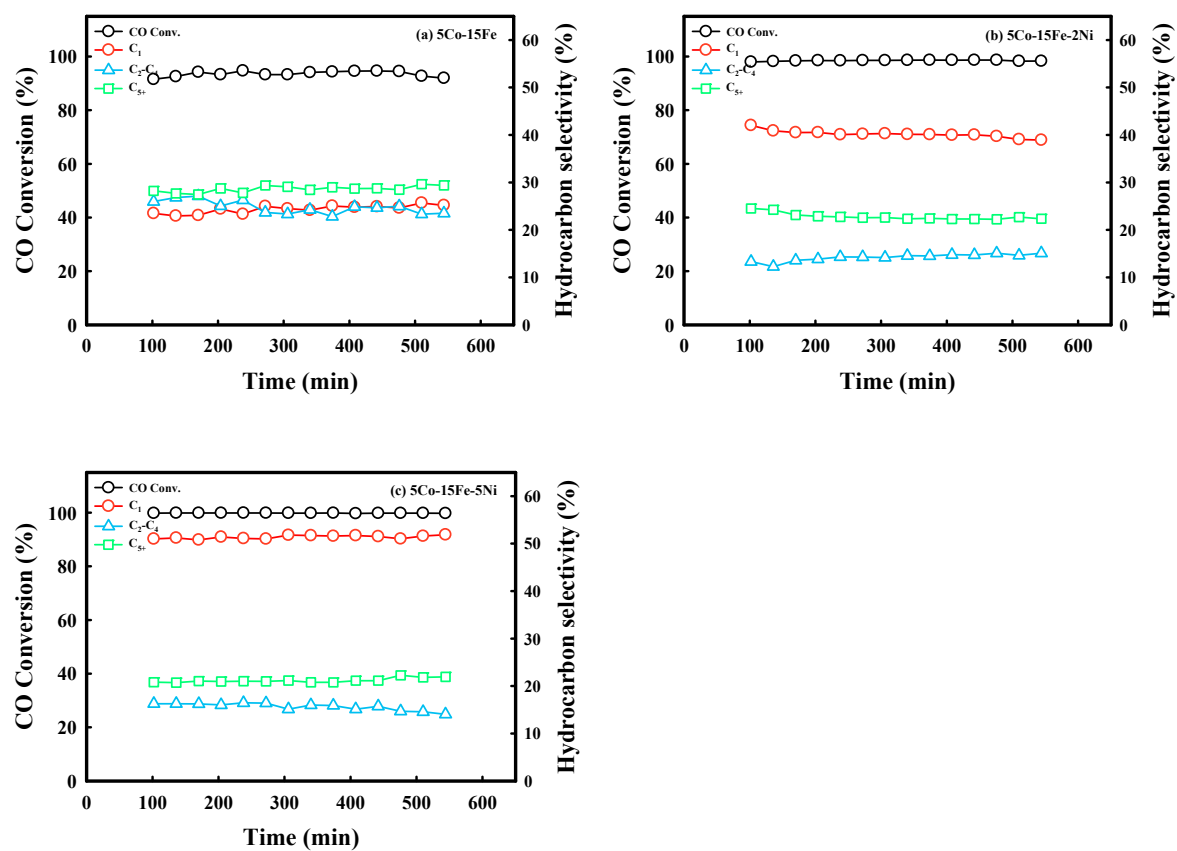

**Figure S2.** The CO conversion and hydrocarbon selectivity over Co-Fe and Co-Fe-Ni catalysts (a–c) as a function of time on stream.
